# Supplementary material
Source: Springer Nature journal article supplement (https://www.springermedizin.de/resource/supplementary/13256_2011_2257_MOESM3_ESM.pdf/9649362)

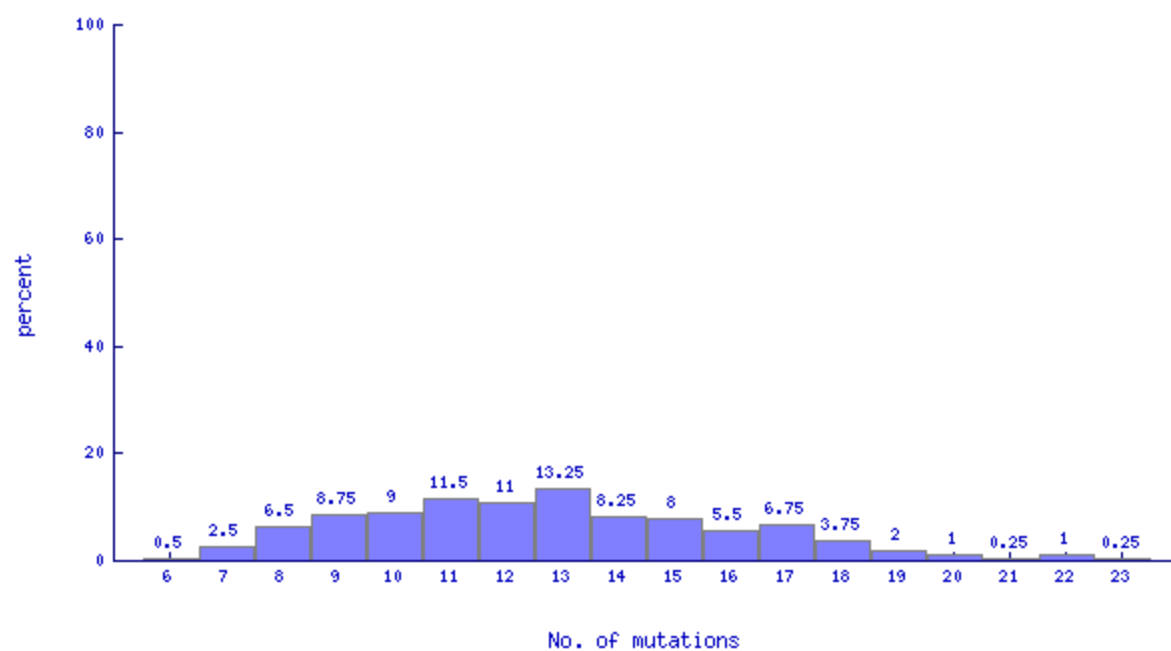

**Figure 3.**

Supplement: MOESM3 [file 9649362]
